# Supplementary material for: Packed hybrid silica nanoparticles as sorbents with thermo-switchable surface chemistry and pore size for fast extraction of environmental pollutants
Source: Royal Society of Chemistry journal article supplement (doi:10.1039/c7ra11869d), 2018-01-01
Supplement: c7ra11869d1.pdf [file c7ra11869d1.pdf]

**SUPPORTING INFORMATION**

**Packed hybrid silica nanoparticles as sorbents with thermo-switchable surface chemistry and pore size for fast extraction of environmental pollutants**

Sushilkumar A. Jadhav <sup>a</sup>, Roberto Nisticò <sup>a,b</sup>, Giuliana Magnacca <sup>a</sup>, Dominique Scarlone <sup>a\*</sup>

<sup>a</sup> Department of Chemistry and NIS Research Centre, University of Torino, 10125 Torino, Italy.

<sup>b</sup> Present address: Polytechnic of Torino, Department of Applied Science and Technology DISAT, C.so Duca degli Abruzzi 24, 10129 Torino (Italy).

\* Corresponding author: phone +39 011 6707546; Fax +39 011 6707855;

E-mail dominique.scarlone@unito.it.

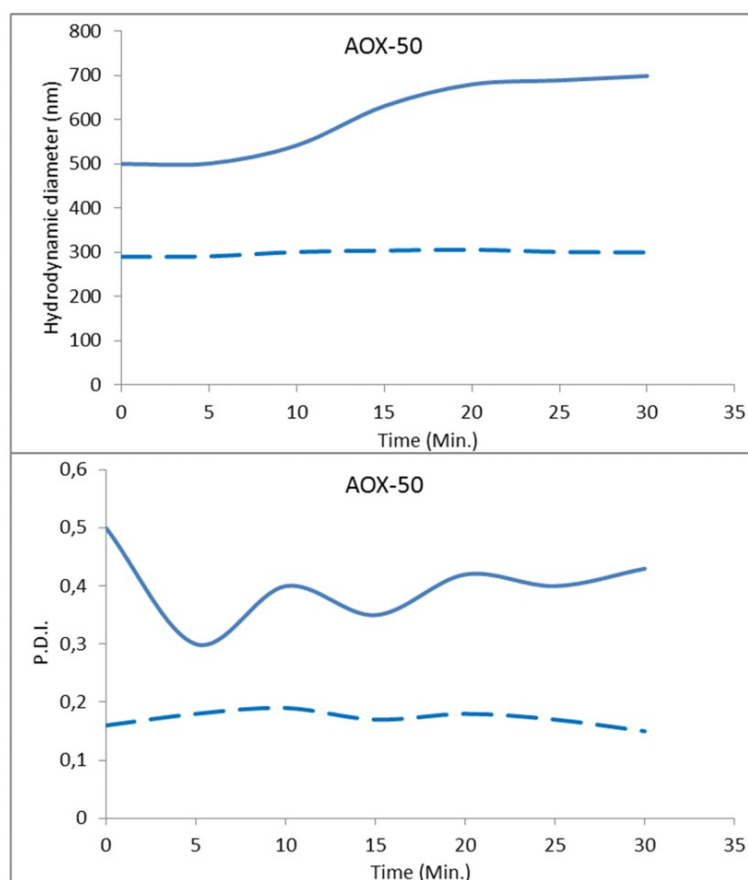

**Fig. S1.** Hydrodynamic diameter and polydispersity index of bare (solid line) and PNIPAM grafted (dashed line) AOX50 SiNPs.

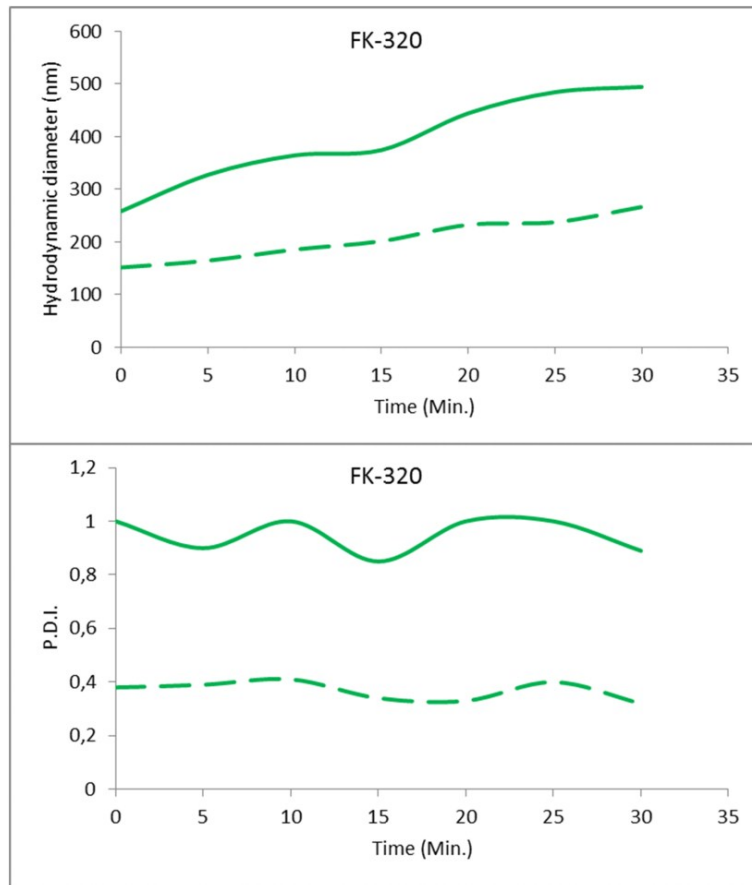

**Fig. S2.** Hydrodynamic diameter and polydispersity index of bare (solid line) and PNIPAM grafted (dashed line) FK320 SiNPs.
